# Supplementary material for: Machine-learning vs. logistic regression for preoperative prediction of medical morbidity after fast-track hip and knee arthroplasty—a comparative study
Source: PubMed Central journal article supplement (PMC10685559; doi:10.1186/s12871-023-02354-z), 2023-11-29
Supplement: 12871_2023_2354_MOESM3_ESM.pdf [file 12871_2023_2354_MOESM3_ESM.pdf]

### Additional file 3

Details on specific drugs with reimbursed prescriptions 6 months preoperatively.

Numbers are n (%)

| Reimbursed prescriptions within 3 months preoperatively   | training set<br>(n:18104) | test set<br>(n:3913) |
|-----------------------------------------------------------|---------------------------|----------------------|
| <u>Anticoagulants</u>                                     |                           |                      |
| none                                                      | 13570 (75.0)              | 2953 (75.5)          |
| VKA                                                       | 729 (4.0)                 | 127 (3.2)            |
| Heparin & Acetylsalicylic acid                            | 6 (0.0)                   | 1 (0.0)              |
| DOAC                                                      | 526 (2.9)                 | 181 (4.6)            |
| Acetylsalicylic acid                                      | 2235 (12.3)               | 462 (11.8)           |
| Dipyradimol                                               | 31 (0.2)                  | 3 (0.1)              |
| ADP-antagonist                                            | 522 (2.9)                 | 122 (3.1)            |
| Acetylsalicylic acid & Dipyradimol                        | 169 (0.9)                 | 16 (0.4)             |
| VKA & Acetylsalicylic acid                                | 81 (0.4)                  | 7 (0.2)              |
| DOAC & Acetylsalicylic acid                               | 42 (0.2)                  | 5 (0.1)              |
| VKA & ADP-antagonist                                      | 13 (0.1)                  | 2 (0.1)              |
| DOAC & ADP-antagonist                                     | 12 (0.1)                  | 5 (0.1)              |
| VKA & Heparin                                             | 22 (0.1)                  | 0 (0.0)              |
| DOAC & Acetylsalicylic acid & ADP-antagonist              | 3 (0.0)                   | 1 (0.0)              |
| Acetylsalicylic acid & ADP-antagonist                     | 124 (0.7)                 | 26 (0.7)             |
| Acetylsalicylic acid & ADP-antagonist & Heparin           | 12 (0.1)                  | 1 (0.0)              |
| Acetylsalicylic acid & ADP-antagonist & Dipyradimol       | 7 (0.0)                   | 1 (0.0)              |
| <u>Cardiac prescriptions</u>                              |                           |                      |
| none                                                      | 7741 (42.8)               | 1780 (45.5)          |
| diuretics                                                 | 1070 (5.9)                | 191 (4.9)            |
| angiotensin-II/ACE-inhibitors                             | 2287 (12.6)               | 528 (13.5)           |
| Ca <sup>2+</sup> antagonists                              | 688 (3.8)                 | 140 (3.6)            |
| β-blocker                                                 | 492 (2.7)                 | 96 (2.5)             |
| nitrates                                                  | 14 (0.1)                  | 5 (0.1)              |
| other antihypertensives                                   | 12 (0.1)                  | 0 (0.0)              |
| other types of medication for IHD                         | 22 (0.1)                  | 1 (0.0)              |
| 2 antihypertensives                                       | 2360 (13.0)               | 513 (13.1)           |
| β-blocker & 1 antihypertensive <sup>1</sup>               | 966 (5.3)                 | 195 (5.0)            |
| 3 antihypertensives                                       | 515 (2.8)                 | 83 (2.1)             |
| β-blocker & 2 antihypertensives <sup>1</sup>              | 902 (5.0)                 | 168 (4.3)            |
| β-blocker & 3 antihypertensives <sup>1</sup>              | 235 (1.3)                 | 55 (1.4)             |
| 4 antihypertensives                                       | 16 (0.1)                  | 4 (0.1)              |
| β-blocker & 4 antihypertensives                           | 15 (0.1)                  | 6 (0.2)              |
| other antihypertensive & antihypertensives <sup>1</sup>   | 78 (0.4)                  | 18 (0.5)             |
| nitrates & any hypertensive                               | 323 (1.8)                 | 57 (1.5)             |
| other drugs for IHD & any antihypertensive and/or nitrate | 16 (0.1)                  | 4 (0.1)              |
| other antiarrhythmics & any antihypertensives             | 352 (1.9)                 | 69 (1.8)             |
| <u>Anticholesterols</u>                                   |                           |                      |
| none                                                      | 12665 (70.0)              | 2762 (70.6)          |
| statins                                                   | 5218 (28.8)               | 1105 (28.2)          |
| other anti-lipids                                         | 118 (0.7)                 | 24 (0.6)             |
| statins +other anti-lipids                                | 103 (0.6)                 | 22 (0.6)             |
| <u>Systemic steroids</u>                                  | 1038 (5.7)                | 234 (6.0)            |

|                                                  |              |             |
|--------------------------------------------------|--------------|-------------|
| <u>Antirheumatics</u>                            |              |             |
| none                                             | 17709 (97.8) | 3822 (97.7) |
| disease-modifying antirheumatic drugs            | 392 (2.2)    | 91 (2.3)    |
| other antirheumatics                             | 3 (0.0)      | 0 (0.0)     |
| <u>Respiratory prescriptions</u>                 |              |             |
| none                                             | 16256 (89.8) | 3498 (89.4) |
| SABA                                             | 235 (1.3)    | 54 (1.4)    |
| LABA or LAMA                                     | 194 (1.1)    | 42 (1.1)    |
| inhalation steroid only                          | 176 (1.0)    | 43 (1.1)    |
| SABA & Ipratropium (+/- others)                  | 24 (0.1)     | 0 (0.0)     |
| LABA & steroid                                   | 432 (2.4)    | 87 (2.2)    |
| LABA & LAMA & steroid                            | 115 (0.6)    | 26 (0.7)    |
| LAMA & steroid                                   | 10 (0.1)     | 1 (0.0)     |
| LABA & LAMA                                      | 56 (0.3)     | 31 (0.8)    |
| other pulmonary drugs                            | 26 (0.1)     | 9 (0.2)     |
| other pulmonary drugs & steroid                  | 95 (0.5)     | 12 (0.3)    |
| SABA & LABA or LAMA                              | 76 (0.4)     | 26 (0.7)    |
| SABA & LABA or LAMA & steroid                    | 409 (2.3)    | 84 (2.1)    |
| <u>Psychotropic prescriptions</u>                |              |             |
| none                                             | 16113 (89.0) | 3496 (89.3) |
| SSRI/SNRI/NaRI                                   | 1055 (5.8)   | 209 (5.3)   |
| other antidepressants                            | 16 (0.1)     | 2 (0.1)     |
| antipsychotics                                   | 104 (0.6)    | 20 (0.5)    |
| benzodiazepines <sup>2</sup>                     | 7 (0.0)      | 0 (0.0)     |
| anti-cholinergics or memantine                   | 27 (0.1)     | 6 (0.2)     |
| anti-ADHD drugs                                  | 7 (0.0)      | 4 (0.1)     |
| NaSSA                                            | 177 (1.0)    | 32 (0.8)    |
| other psychotropics                              | 166 (0.9)    | 44 (1.1)    |
| SSRI + other antidepressants                     | 9 (0.0)      | 1 (0.0)     |
| SSRI + NaSSA                                     | 86 (0.5)     | 16 (0.4)    |
| SRRI + antipsychotics                            | 80 (0.4)     | 18 (0.5)    |
| SRRI + other psychotropics                       | 72 (0.4)     | 19 (0.5)    |
| benzodiazepines + any psychotropic               | 11 (0.1)     | 4 (0.1)     |
| antipsychotics + any psychotropic                | 137 (0.8)    | 32 (0.8)    |
| anti-ADHD + any psychotropic                     | 11 (0.1)     | 3 (0.1)     |
| NaSSA + any psychotropic                         | 16 (0.1)     | 6 (0.2)     |
| other psychotropics + any specified psychotropic | 10 (0.1)     | 1 (0.0)     |

VKA: vitamin K antagonists DOAC: direct oral anticoagulant ADP: Adenosine diphosphate ACE: angiotensin converting enzyme IHD: Ischemic heart disease SABA: Short-acting beta agonist LABA: long-acting beta agonist LAMA: Long-acting muscarinic antagonist SSRI: Selective serotonin inhibitor SNRI: Serotonin and norepinephrine reuptake inhibitor NaRI: Norepinephrine reuptake inhibitor NaSSA: Norepinephrine and specific serotonergic antidepressants

<sup>1</sup>either diuretics, ACE/ANG-II inhibitors or Ca<sup>2+</sup>antagonists <sup>2</sup>likely underreported due to limited general reimbursement for benzodiazepines in Denmark
