# Supplementary material for: Machine-learning vs. logistic regression for preoperative prediction of medical morbidity after fast-track hip and knee arthroplasty—a comparative study
Source: PubMed Central journal article supplement (PMC10685559; doi:10.1186/s12871-023-02354-z), 2023-11-29
Supplement: 12871_2023_2354_MOESM4_ESM.pdf [file 12871_2023_2354_MOESM4_ESM.pdf]

## Additional file 4

Performance of the different models with a predefined positive prediction fraction of 25 and 30 for the primary outcome (LOS >4 days or readmission due to "medical" morbidity).

| <b>Positive prediction fraction 25%</b> | TP  | FP   | FN | TN   | Sensitivity % | Precision % | MCC % | AUROC % | AUPRC % | Brier % | P(sensitivity) % |
|-----------------------------------------|-----|------|----|------|---------------|-------------|-------|---------|---------|---------|------------------|
| Full machine-learning model             | 120 | 858  | 62 | 2873 | 65.9          | 12.3        | 20.9  | 77.0    | 15.3    | 4.32    | -                |
| Full logistic regression model          | 108 | 870  | 74 | 2861 | 59.3          | 11.0        | 17.5  | 74.6    | 15.6    | 4.32    | 10.4             |
| Parsimonious machine-learning model     | 114 | 864  | 68 | 2867 | 62.6          | 11.7        | 19.2  | 74.9    | 14.1    | 4.35    | 26.2             |
| Parsimonious logistic regression model  | 103 | 875  | 79 | 2856 | 56.6          | 10.5        | 16.1  | 73.6    | 15.2    | 4.33    | 3.9              |
| Age-model                               | 94  | 824  | 88 | 2907 | 51.6          | 10.2        | 14.7  | 69.7    | 12.2    | 38.8    | 1.2              |
| <b>Positive prediction fraction 30%</b> | TP  | FP   | FN | TN   | Sensitivity % | Precision % | MCC % | AUROC % | AUPRC % | Brier % | P(sensitivity) % |
| Full machine-learning model             | 130 | 1043 | 52 | 2688 | 71.4          | 11.1        | 20.0  | 77.0    | 15.3    | 4.32    | -                |
| Full logistic regression model          | 117 | 1056 | 65 | 2675 | 64.2          | 10.0        | 16.5  | 74.6    | 15.6    | 4.32    | 8.4              |
| Parsimonious machine-learning model     | 124 | 1049 | 58 | 2682 | 68.1          | 10.6        | 18.4  | 74.9    | 14.1    | 4.35    | 30.0             |
| Parsimonious logistic regression model  | 118 | 1055 | 64 | 2676 | 64.8          | 10.1        | 16.8  | 73.6    | 15.2    | 4.33    | 14.0             |
| Age-model                               | 100 | 955  | 82 | 2776 | 54.9          | 9.5         | 13.9  | 69.7    | 12.2    | 38.8    | 0.9              |

TP: true positives FP: false positives FN: false negatives TN: true negatives MCC: Matthews correlation coefficient AUROC: area under the receiver operating curve AUPRC: area under the precision recall curve P(sensitivity): probability that the model performs better than the machine-learning model relative to sensitivity.
