# Supplementary material for: Machine-learning vs. logistic regression for preoperative prediction of medical morbidity after fast-track hip and knee arthroplasty—a comparative study
Source: PubMed Central journal article supplement (PMC10685559; doi:10.1186/s12871-023-02354-z), 2023-11-29
Supplement: 12871_2023_2354_MOESM5_ESM.pdf [file 12871_2023_2354_MOESM5_ESM.pdf]

## Additional File 5

Performance of different models for the secondary outcome (LOS >4 days or readmissions due to “medical” morbidity or LOS >4 days but without recorded morbidity)

| <b>Positive prediction fraction 20%</b> | TP  | FP   | FN  | TN   | Sensitivity % | Precision % | MCC % | AUROC % | AUPRC % | Brier % | P(sensitivity) % |
|-----------------------------------------|-----|------|-----|------|---------------|-------------|-------|---------|---------|---------|------------------|
| Full machine-learning model             | 117 | 665  | 112 | 3019 | 51.1          | 15.0        | 19.4  | 75.0    | 18.1    | 5.23    | -                |
| Full logistic regression model          | 115 | 667  | 114 | 3017 | 50.2          | 14.7        | 18.9  | 74.1    | 16.7    | 5.35    | 46.4             |
| Parsimonious machine-learning model     | 109 | 673  | 120 | 3011 | 47.6          | 13.9        | 17.2  | 72.1    | 15.8    | 5.33    | 35.2             |
| Parsimonious logistic regression model  | 109 | 673  | 120 | 3011 | 47.6          | 13.9        | 17.2  | 72.9    | 16.7    | 5.37    | 22.6             |
| Age-model                               | 102 | 661  | 127 | 3023 | 44.5          | 13.4        | 15.8  | 68.7    | 13.4    | 38.3    | 10.3             |
| <b>Positive prediction fraction 25%</b> | TP  | FP   | FN  | TN   | Sensitivity % | Precision % | MCC % | AUROC % | AUPRC % | Brier % | P(sensitivity) % |
| Full machine-learning model             | 128 | 850  | 101 | 2834 | 55.9          | 13.1        | 17.8  | 75.0    | 18.1    | 5.23    | -                |
| Full logistic regression model          | 133 | 845  | 96  | 2839 | 58.1          | 13.6        | 19.1  | 74.1    | 16.7    | 5.35    | 68.0             |
| Parsimonious machine-learning model     | 121 | 857  | 108 | 2827 | 52.8          | 12.3        | 16.3  | 72.1    | 15.8    | 5.33    | 25.5             |
| Parsimonious logistic regression model  | 127 | 851  | 102 | 2833 | 55.5          | 13.0        | 17.5  | 72.9    | 16.7    | 5.37    | 46.6             |
| Age-model                               | 113 | 805  | 116 | 2879 | 49.3          | 12.3        | 15.2  | 68.7    | 13.4    | 38.3    | 17.2             |
| <b>Positive prediction fraction 30%</b> | TP  | FP   | FN  | TN   | Sensitivity % | Precision % | MCC % | AUROC % | AUPRC % | Brier % | P(sensitivity) % |
| Full machine-learning model             | 146 | 1027 | 83  | 2657 | 63.4          | 12.4        | 18.4  | 75.0    | 18.1    | 5.23    | -                |
| Full logistic regression model          | 144 | 1029 | 85  | 2655 | 62.9          | 12.3        | 17.9  | 74.1    | 16.7    | 5.35    | 42.4             |
| Parsimonious machine-learning model     | 135 | 1038 | 94  | 2651 | 59.0          | 11.5        | 15.8  | 72.1    | 15.8    | 5.33    | 14.9             |
| Parsimonious logistic regression model  | 140 | 1033 | 89  | 2651 | 61.1          | 11.9        | 17.0  | 72.9    | 16.7    | 5.37    | 28.3             |
| Age-model                               | 122 | 933  | 107 | 2751 | 53.3          | 11.6        | 14.8  | 68.7    | 13.4    | 38.3    | 7.9              |

TP: true positives FP: false positives FN: false negatives TN: true negatives MCC: Matthews correlation coefficient AUROC: area under the receiver operating curve AUPRC: area under the precision recall curve P(sensitivity): probability that a model performs better than the machine-learning model relative to sensitivity.
